# Supplementary material
Source: Springer Nature journal article supplement (https://www.springermedizin.de/resource/supplementary/12882_2013_816_MOESM3_ESM.pdf/9454370)

**A**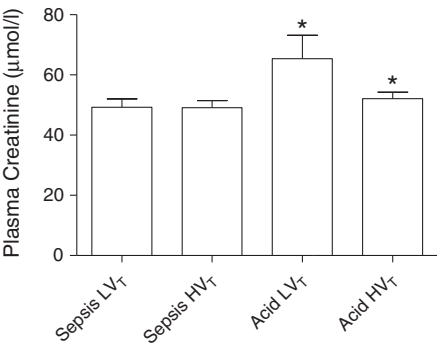**B**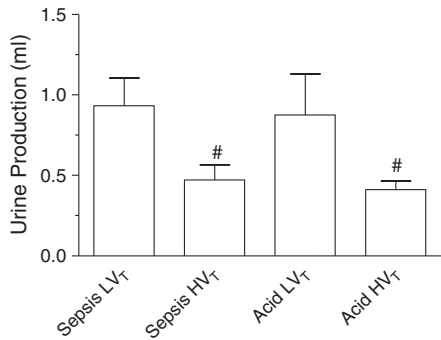**C**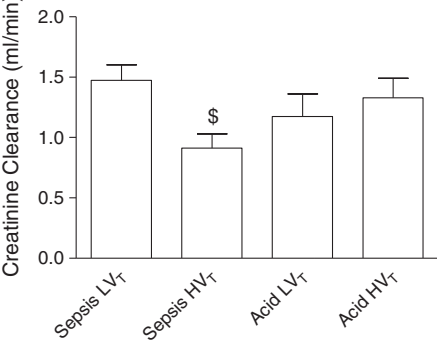

Supplement: MOESM3 [file 9454370]
